# Supplementary material for: Organic phase synthesis of monodisperse iron oxide nanocrystals using iron chloride as precursor
Source: Royal Society of Chemistry journal article supplement (doi:10.1039/b9nr00400a), 2010-01-01
Supplement: b9nr00400a.pdf [file b9nr00400a.pdf]

## Organic Phase Synthesis of Monodisperse Iron Oxide Nanocrystals Using Iron Chloride as Precursor

Zhichuan Xu, Chengmin Shen, Yuan Tian, Xuezhao Shi, H.-J. Gao\*

*Beijing National Laboratory for Condensed Matter Physics, Institute of Physics, Chinese Academy of  
Science, Beijing 100080, P. R. China*

E-mail: hjgao@aphy.iphy.ac.cn

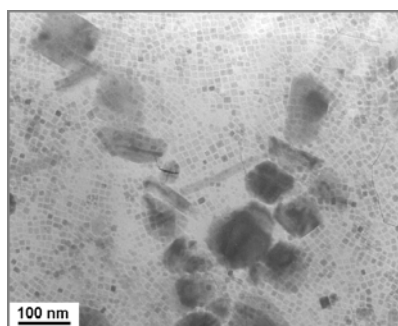

**Figure S1.** The reaction also produced 60-100 nm particles in a small amount, which were readily removed by centrifuging a hexane solution of NCs at 3000 rpm.

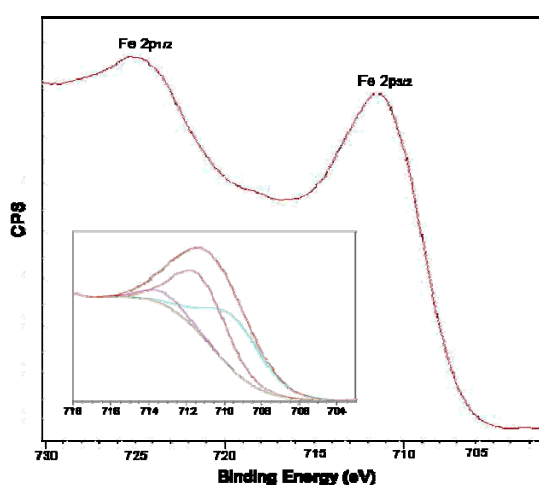

**Figure S2.** The XPS spectrum of iron oxide nanocrystals at the energy range of Fe 2p. The multiplets of Fe 2p<sub>3/2</sub> (the inset) show the characteristic peaks of Fe<sup>2+</sup> at 709.4 eV and Fe<sup>3+</sup> at 711.3 eV from magnetite as well as the characteristic peaks of Fe<sup>3+</sup> at 713.3 eV from maghemite.

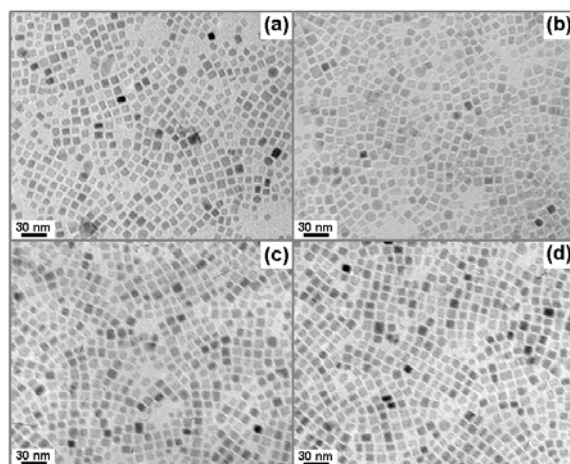

**Figure S3.** The TEM images of cubic iron oxide NCs synthesized at different heating rates: (a) 1.5, (b) 10, (c) 20, and (d) 30 K/min. The morphologies of iron oxide NCs were similar and no remarkable difference in size or shape was observed.

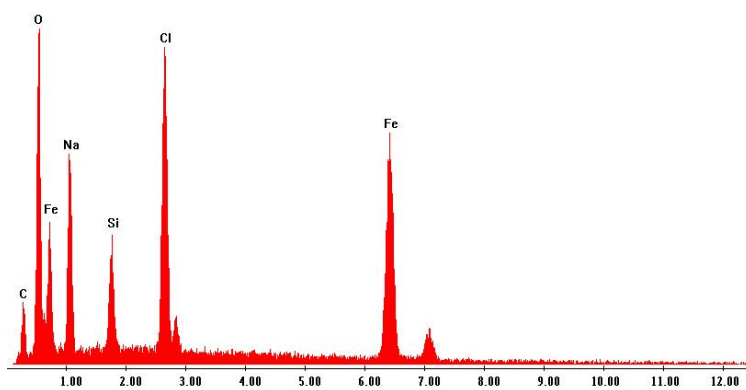

**Figure S4.** The energy dispersive X-ray (EDX) spectrum of iron oxide NCs without water washing. NaCl was produced through the reaction between  $\text{FeCl}_3$  and Na-oleate at the thermal condition.

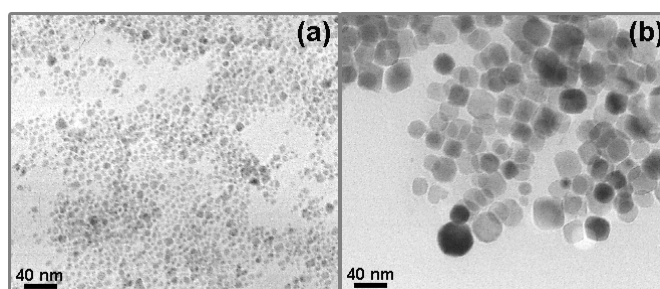

**Figure S5.** The TEM images of (a) NCs synthesized using  $\text{Fe}(\text{acac})_2$  in the absence of  $\text{Cl}^-$  and (b) NCs synthesized using oleylamine and oleic acid in the absence of  $\text{Na}^+$ .

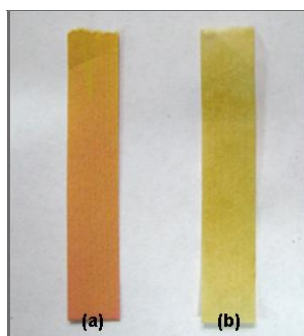

**Figure S6.** The pH value of the emission gas was below 7 when surfactants (oleic acid and oleylamine) were used in the reaction (a), while the pH value was close to 7 when Na-oleate was used.

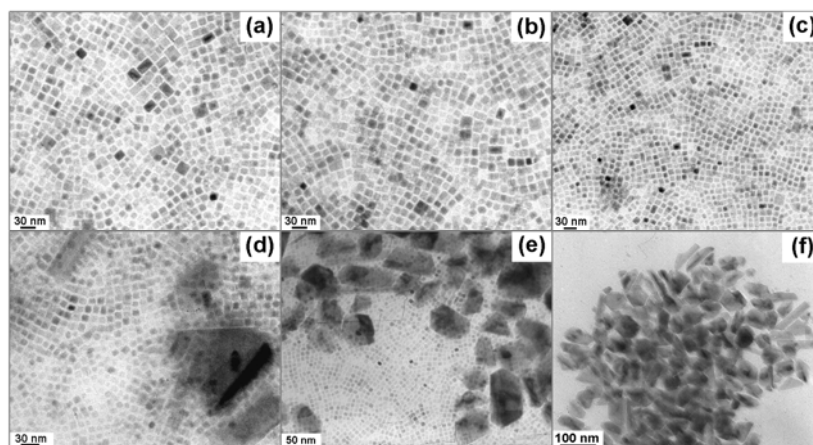

**Figure S7.** The TEM images of iron oxide NCs synthesized using 0.1, 0.5, 1, 1.5, 2, and 3 mmol NaCl as additive.

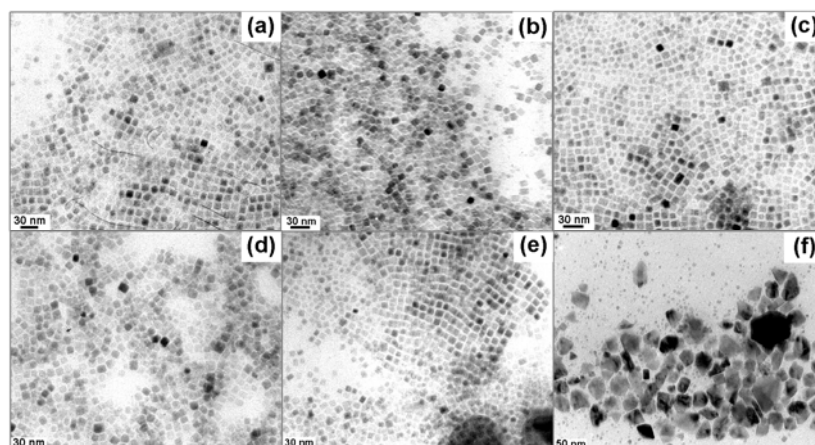

**Figure S8.** The TEM images of iron oxide NCs synthesized using 0.1, 0.5, 1, 1.5, 2, and 3 mmol NaBr as additive.

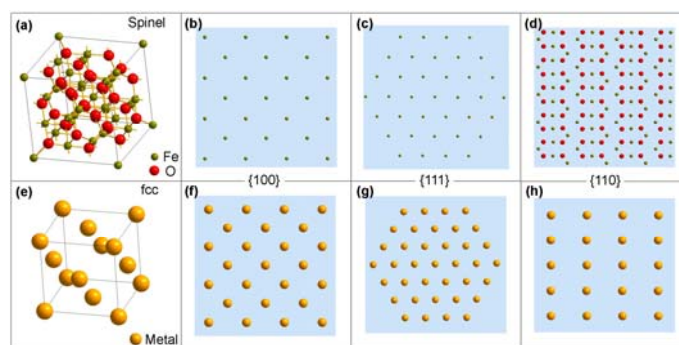

**Figure S9.** The crystal structures and low-index facets configurations of spinel iron oxide and fcc noble metals. The {100} and {111} surfaces of the spinel (including the inverse spinel) are only iron (III) cations packed and they exhibit similar configurations with the {100} and {111} of fcc.

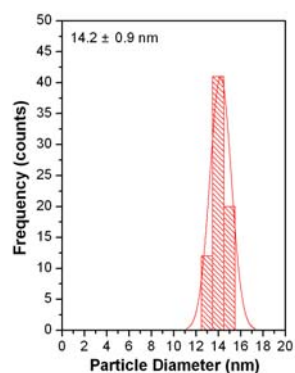

**Figure S10.** The size distribution histogram of spherical iron oxide NCs.

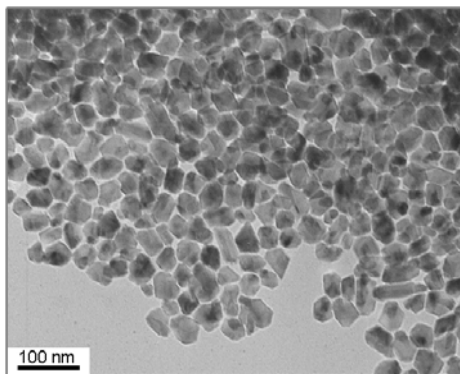

**Figure S11.** The TEM image of NCs synthesized as the ratio of feeding Co/Fe increased to 1.
